# Supplementary material
Source: HighWire-hosted journal article supplement (https://jnnp.bmj.com/content/jnnp-2020-325796)

**Figure S6 Hospital-based, any (first or recurrent) stroke, excluding pre-stroke dementia versus Population, any (first or recurrent) stroke, excluding pre-stroke dementia**

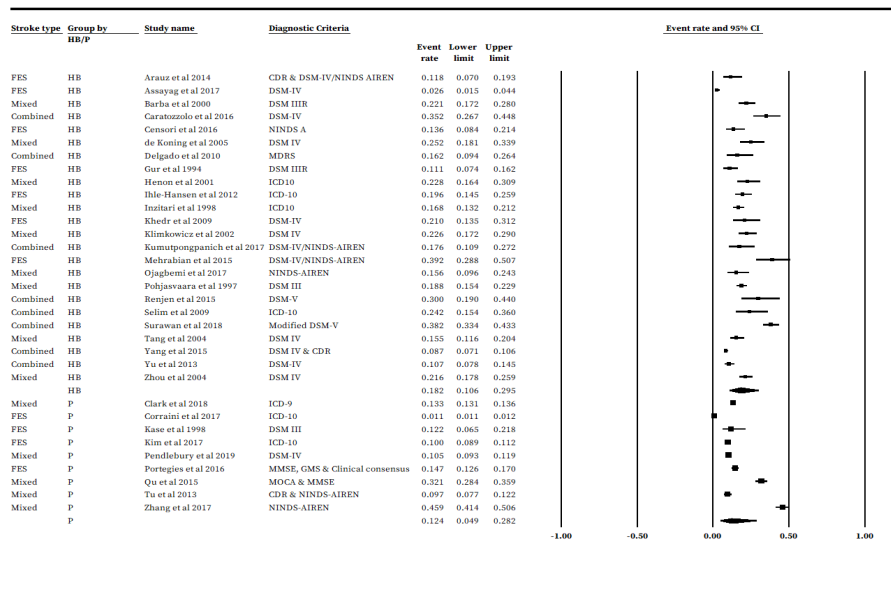

Supplement: inline-supplementary-material-10 [file inline-supplementary-material-10.pdf]
